# Supplementary material
Source: PubMed Central journal article supplement (PMC5151177)
Supplement: NIHMS407331-supplement-2.pdf [file NIHMS407331-supplement-2.pdf]

**Table S1: pLYN, pSYK and pBTK levels in DLBCL cell lines**

| Cell line  |                | pLYN <sup>+</sup> | pSYK <sup>+</sup> | pBTK <sup>+</sup> | ⟨pSYK <sup>+</sup> ,pBTK <sup>+</sup> ⟩ |
|------------|----------------|-------------------|-------------------|-------------------|-----------------------------------------|
| LY7        | Untreated      | 2.20 ± 0.72       | 2.59 ± 0.75       | 0.11 ± 0.02       | 1.80 ± 0.52                             |
|            | Crosslinked    | 66.0 ± 16.8       | 66.0 ± 28.3       | 12.4 ± 8.6        | 48.9 ± 22.0                             |
|            | <i>t</i> -test | 0.02              | 0.06              | 0.13              | 0.07                                    |
| U2932      | Untreated      | 0.72 ± 0.65       | 0.46 ± 0.09       | 2.13 ± 3.00       | 1.00 ± 0.90                             |
|            | Crosslinked    | 57.5 ± 11.0       | 65.2 ± 5.6        | 28.1 ± 11.4       | 53.3 ± 6.4                              |
|            | <i>t</i> -test | 0.01              | 0.003             | 0.05              | 0.004                                   |
| DHL4       | Untreated      | 45.6 ± 21.8       | 3.76 ± 1.77       | 0.51 ± 0.62       | 2.19 ± 1.24                             |
|            | Crosslinked    | 76.9 ± 14.0       | 75.1 ± 13.8       | 46.1 ± 8.5        | 65.8 ± 12.1                             |
|            | <i>t</i> -test | 0.12              | 0.01              | 0.01              | 0.01                                    |
| DHL6       | Untreated      | 36.0 ± 28.0       | 3.76 ± 1.77       | 2.26 ± 1.42       | 3.28 ± 0.88                             |
|            | Crosslinked    | 78.4 ± 6.6        | 43.4 ± 16.0       | 16.5 ± 8.0        | 34.8 ± 13.4                             |
|            | <i>t</i> -test | 0.11              | 0.05              | 0.09              | 0.05                                    |
| HBL-1      | Untreated      | 21.3 ± 23.5       | 7.50 ± 3.10       | 1.85 ± 1.93       | 5.69 ± 1.71                             |
|            | Crosslinked    | 90.5 ± 2.0        | 80.0 ± 15.5       | 51.3 ± 32.7       | 70.8 ± 20.3                             |
|            | <i>t</i> -test | 0.04              | 0.01              | 0.12              | 0.03                                    |
| LY3        | Untreated      | 25.9 ± 19.8       | 0.77 ± 0.70       | 0.41 ± 0.34       |                                         |
|            | Crosslinked    | 63.0 ± 11.6       | 7.74 ± 4.92       | 1.49 ± 2.09       |                                         |
|            | <i>t</i> -test | 0.06              | 0.13              | 0.46              |                                         |
| Pfeiffer   | Untreated      | 13.0 ± 7.9        | 4.15 ± 3.37       | 13.1 ± 5.0        |                                         |
|            | Crosslinked    | 43.0 ± 24.6       | 16.2 ± 13.7       | 27.6 ± 4.3        |                                         |
|            | <i>t</i> -test | 0.16              | 0.26              | 0.02              |                                         |
| Toledo     | Untreated      | 0.42 ± 0.29       | 0.28 ± 0.34       | 0.13 ± 0.12       |                                         |
|            | Crosslinked    | 0.40 ± 0.38       | 0.33 ± 0.44       | 0.15 ± 0.14       |                                         |
|            | <i>t</i> -test | 0.94              | 0.88              | 0.88              |                                         |
| Karpas 422 | Untreated      | 1.51 ± 1.77       | 0.13 ± 0.17       | 0.12 ± 0.16       |                                         |
|            | Crosslinked    | 14.8 ± 14.5       | 1.17 ± 1.70       | 0.62 ± 1.00       |                                         |
|            | <i>t</i> -test | 0.25              | 0.40              | 0.47              |                                         |
| LY4        | Untreated      | 1.55 ± 0.89       | 1.73 ± 1.02       | 1.07 ± 1.05       |                                         |
|            | Crosslinked    | 1.30 ± 0.44       | 1.09 ± 0.62       | 1.13 ± 1.59       |                                         |
|            | <i>t</i> -test | 0.69              | 0.42              | 0.96              |                                         |

**Table S2: DLBCL cell line classification**

| DLBCL cell line |          | Molecular Profiling |       |
|-----------------|----------|---------------------|-------|
|                 |          | CC                  | COO   |
| Group I         | LY7      | BCR*                | GCB§  |
|                 | U2932    | NR†                 | ABC§  |
|                 | DHL4     | BCR*                | GCB** |
|                 | DHL6     | BCR*                | GCB§  |
|                 | HBL-1    | NR†                 | ABC§  |
| Group II        | LY3      | BCR‡                | ABC§  |
|                 | Pfeiffer | OxPhos*             | NR†   |
|                 | Toledo   | OxPhos*             | NR†   |
|                 | K422     | OxPhos*             | GCB†† |
|                 | LY4      | OxPhos*             | NR†   |

\*Polo et al.(56)

†Not reported

‡Chen et al. (22)

§Ngo et al. (57)

\*\*Davis et al. (21)

††Brown et al. (58).

**Table S3: Clinical Features of DLBCL cases<sup>1</sup>**

| #  | Age | Sex | History                | Location                   | CD10 | BCL6 | MUM1 | Hans    | MIB (%) | EBV |
|----|-----|-----|------------------------|----------------------------|------|------|------|---------|---------|-----|
| 1  | 66  | M   | h/o DLBCL              | Left flank, muscle         | +    | ND   | ND   | GCB     | NE      | NE  |
| 2  | 49  | M   | no h/o NHL             | Neck mass, left            | +    | +    | -    | GCB     | >95     | -   |
| 3  | 59  | F   | no h/o NHL             | Cervical LN, right         | -    | -    | +    | Non-GCB | NE      | NE  |
| 4  | 75  | F   | no h/o NHL             | Supraclavicular LN, right  | +    | +    | -    | GCB     | 95      | NE  |
| 5  | 70  | F   | no h/o NHL             | Mesenteric mass            | -    | +    | -    | GCB     | 90-95   | NE  |
| 6  | 69  | F   | no h/o NHL             | Scapula lesion, right      | -    | +    | -    | GCB     | 80-90   | NE  |
| 7  | 53  | F   | no h/o NHL             | Inguinal LN, right         | -    | +    | +    | Non-GCB | 30      | -   |
| 8  | 75  | M   | no h/o NHL             | Supraclavicular LN, right  | -    | +    | +    | Non-GCB | 50-60   | NE  |
| 9  | 33  | M   | no h/o NHL             | Axillary LN, left          | -    | +    | -    | GCB     | NE      | NE  |
| 10 | 63  | F   | no h/o NHL             | Frontal skull tumor        | +    | +    | -    | GCB     | 90      | NE  |
| 11 | 33  | M   | no h/o NHL             | Axillary mass, left        | +    | +    | ND   | GCB     | >90     | -   |
| 12 | 76  | F   | no h/o NHL             | Cervical LN, right         | -    | -    | +    | Non-GCB | 70      | NE  |
| 13 | 33  | F   | h/o NHL                | Soft tissue, nasal pharynx | -    | +    | -    | GCB     | 90      | NE  |
| 14 | 67  | F   | h/o low grade lymphoma | Hilar mass, left           | -    | +    | -    | GCB     | >95     | NE  |
| 15 | 67  | F   | no h/o NHL             | Cervical LN, right         | -    | +    | -    | GCB     | >95     | NE  |
| 16 | 65  | F   | no h/o NHL             | Splenic mass               | -    | +    | +    | Non-GCB | 60-70   | NE  |
| 17 | 62  | M   | no h/o NHL             | Neck mass, left            | -    | -    | +    | Non-GCB | 60-70   | NE  |
| 18 | 46  | M   | no h/o NHL             | Cervical LN, left          | +    | +    | -    | GCB     | 90      | NE  |
| 19 | 76  | M   | h/o NHL in small bowel | Small bowel                | +    | +    | -    | GCB     | 30-40   | NE  |
| 20 | 80  | M   | no h/o NHL             | Supraclavicular LN, left   | -    | -    | +    | Non-GCB | 85-90   | NE  |
| 21 | 78  | F   | no h/o NHL             | Supraclavicular LN, left   | -    | +    | +    | Non-GCB | NE      | -   |
| 22 | 65  | M   | no h/o NHL             | Stomach                    | -    | +    | +    | Non-GCB | >95     | NE  |
| 23 | 69  | F   | no h/o NHL             | Soft tissue, right cheek   | +    | +    | -    | GCB     | 80      | -   |
| 24 | 46  | M   | no h/o NHL             | Suprathyroid LN, right     | -    | +    | +    | Non-GCB | 60      | -   |
| 25 | 65  | F   | no h/o NHL             | Cervical LN, right         | -    | +    | +    | Non-GCB | 80      | -   |
| 26 | 68  | M   | no h/o NHL             | Chest wall mass, right     | +    | +    | ND   | GCB     | 60      | NE  |
| 27 | 72  | M   | no h/o NHL             | Inguinal LN, left          | -    | -    | +    | Non-GCB | 90      | NE  |
| 28 | 38  | M   | no h/o NHL             | Cervical LN, left          | -    | +    | +    | Non-GCB | 50%     | +   |
| 29 | 64  | F   | no h/o NHL             | Retroperitoneal mass       | +    | +    | ND   | GCB     | 60      | NE  |
| 30 | 45  | F   | no h/o NHL             | Inguinal LN, left          | -    | -    | +    | Non-GCB | 40-50   | NE  |
| 31 | 76  | M   | no h/o NHL             | Mediastinal mass           | -    | -    | +    | Non-GCB | >90     | NE  |
| 32 | 80  | F   | no h/o NHL             | Splenic mass               | -    | +    | +    | Non-GCB | 90      | NE  |
| 33 | 72  | M   | no h/o NHL             | Cervical LN, left          | +    | +    | -    | GCB     | 80      | NE  |
| 34 | 71  | F   | no h/o NHL             | Omental nodule             | +    | +    | ND   | GCB     | 80      | NE  |
| 35 | 78  | F   | no h/o NHL             | Tonsil, left               | -    | +    | +    | Non-GCB | 70      | NE  |
| 36 | 48  | F   | no h/o NHL             | Cervical LN, left          | -    | +    | -    | Non-GCB | NE      | -   |
| 37 | 78  | M   | no h/o NHL             | Inguinal LN, left          | +    | +    | -    | GCB     | >95     | -   |
| 38 | 77  | F   | no h/o NHL             | Inguinal LN, right         | +    | +    | +    | GCB     | NE      | NE  |
| 39 | 66  | F   | no h/o NHL             | Cervical LN, right         | -    | +    | -    | GCB     | 80-90   | NE  |

|    |    |   |                         |                          |   |   |   |         |       |    |
|----|----|---|-------------------------|--------------------------|---|---|---|---------|-------|----|
| 40 | 32 | M | no h/o NHL              | Mediastinal mass         | + | + | + | GCB     | 70-80 | NE |
| 41 | 75 | F | no h/o NHL              | Axillary LN, left        | - | + | + | Non-GCB | 80-90 | NE |
| 42 | 53 | M | no h/o NHL              | Cervical LN, left        | - | - | + | Non-GCB | 50-60 | NE |
| 43 | 87 | F | no h/o NHL              | Thyroid mass, right      | - | + | + | Non-GCB | NE    | NE |
| 44 | 60 | M | no h/o NHL              | Submandibular mass, left | + | + | + | GCB     | NE    | NE |
| 45 | 84 | M | no h/o NHL              | C7 vertebral mass        | - | - | + | Non-GCB | NE    | NE |
| 46 | 27 | M | no h/o NHL              | Cervical LN, left        | - | + | - | GCB     | >95   | NE |
| 47 | 83 | M | no h/o NHL              | Splenic mass             | + | + | - | GCB     | 70-80 | NE |
| 48 | 69 | M | no h/o NHL              | Perisplenic mass         | + | + | - | GCB     | NE    | NE |
| 49 | 49 | F | no h/o NHL              | Inguinal LN, right       | + | + | - | GCB     | 50    | NE |
| 50 | 81 | F | no h/o NHL              | Sacral tumor             | - | - | + | Non-GCB | 80    | NE |
| 51 | 57 | F | no h/o NHL              | Thyroid mass             | + | + | + | GCB     | 80    | NE |
| 52 | 73 | F | no h/o NHL              | Inguinal LN, left        | - | + | + | Non-GCB | 80-90 | NE |
| 53 | 62 | M | no h/o NHL              | Splenic mass             | + | - | - | GCB     | 70-80 | NE |
| 54 | 70 | F | h/o NHL                 | Left upper quadrant      | + | + | + | GCB     | >90   | NE |
| 55 | 39 | F | no h/o NHL              | Brain                    | + | + | + | GCB     | 90    | -  |
| 56 | 73 | M | no h/o NHL              | Testes                   | - | + | + | Non-GCB | 50    | NE |
| 57 | 55 | M | h/o NHL                 | Inguinal LN, right       | + | + | - | GCB     | 35    | NE |
| 58 | 65 | F | h/o NHL                 | Scapular LN              | + | + | - | GCB     | 90    | NE |
| 59 | 69 | F | h/o NHL                 | Inguinal LN, right       | + | + | - | GCB     | NE    | NE |
| 60 | 75 | M | h/o follicular lymphoma | Inguinal LN, right       | + | + | - | GCB     | 55    | -  |

<sup>1</sup>Abbreviations: (+) positive, (-) negative, (ND) Not determined, (NE) not examined

**Table S4: BCR phosphomarkers and FOXO1 levels in DLBCL TMA**

| Case # | CD20 <sup>+</sup> | pLYN <sup>+</sup><br>CD20 <sup>+</sup> | pSYK <sup>+</sup><br>CD20 <sup>+</sup> | pBTK <sup>+</sup><br>CD20 <sup>+</sup> | D(pSYK <sup>+</sup> ,pBTK <sup>+</sup> )<br>CD20 <sup>+</sup> | FOXO1 <sub>tot</sub><br>CD20 <sup>+</sup> | FOXO1 <sub>cyt</sub><br>CD20 <sup>+</sup> | F <sub>cyt/tot</sub> | F <sub>Ex1</sub><br>(0-2) | F <sub>Ex2</sub><br>(0-3) |
|--------|-------------------|----------------------------------------|----------------------------------------|----------------------------------------|---------------------------------------------------------------|-------------------------------------------|-------------------------------------------|----------------------|---------------------------|---------------------------|
| 59     | 95.4 ± 2.6        | 62 ± 29                                | 97.1 ± 2.0                             | 92.2 ± 2.8                             | 94.7±2.3                                                      | 98.8 ± 1.8                                | 94.4 ± 0.6                                | 95.5 ± 1.4           | 2                         | 2                         |
| 15     | 93.0 ± 4.7        | 85.2 ± 8.3                             | 91.4 ± 6.2                             | 81.1 ± 3.4                             | 86.6±3.2                                                      | 95.7 ± 0.8                                | 93.4 ± 3.1                                | 97.6 ± 2.5           | 2                         | 2                         |
| 37     | 94.5 ± 1.9        | 77.5 ± 2.7                             | 89.3 ± 3.1                             | 68 ± 18                                | 80.1±7.5                                                      | 35 ± 13                                   | 6.8 ± 2.3                                 | 24.4 ± 19.4          | 0                         | 1                         |
| 11     | 96.6 ± 2.3        | 93.2 ± 4.6                             | 71.3 ± 15.6                            | 89.3 ± 2.4                             | 79.8±8.6                                                      | 92.6 ± 1.7                                | 85.4 ± 5.8                                | 92.1 ± 4.6           | 2                         | 2                         |
| 13     | 89.8 ± 4.0        | 74.0 ± 4.4                             | 88.0 ± 1.3                             | 64.5 ± 2.3                             | 76.9±0.9                                                      | 95.0 ± 1.2                                | 95.8 ± 0.3                                | 100.0 ± 0.0          | 2                         | 3                         |
| 3      | 74 ± 11           | 46.2 ± 8.3                             | 73.0 ± 13.4                            | 79.4 ± 4.6                             | 76.0±4.9                                                      | 86.2 ± 4.6                                | 70 ± 18                                   | 81 ± 17              | 2                         | 2                         |
| 25     | 85.4 ± 7.5        | 74.0 ± 9.3                             | 69 ± 17                                | 77 ± 14                                | 73±16                                                         | 78.2 ± 5.5                                | 34.4 ± 4.4                                | 44.0 ± 5.0           | 1                         | 2                         |
| 51     | 83.2 ± 4.2        | 28.1 ± 9.9                             | 64 ± 15                                | 64 ± 10                                | 63.9±5.0                                                      | 36.5 ± 2.2                                | 10.8 ± 3.7                                | 30 ± 12              | 0                         | 2                         |
| 8      | 95.6 ± 2.2        | 71.1 ± 7.7                             | 76.1 ± 7.0                             | 38 ± 11                                | 60.3±8.6                                                      | 95.2 ± 0.0                                | 60 ± 40                                   | 63 ± 42              | 2                         | 1                         |
| 30     | 71 ± 14           | 67.8 ± 8.3                             | 48.6 ± 0.4                             | 72.6 ± 6.7                             | 59.9±2.9                                                      | 94.7 ± 3.5                                | 87.3 ± 6.8                                | 92.1 ± 4.0           | 2                         | 2                         |
| 34     | 82.5 ± 2.9        | 66.5 ± 5.0                             | 61 ± 14                                | 42 ± 15                                | 52±14                                                         | 12.3 ± 5.9                                | 2.7 ± 2.2                                 | 18 ± 13              | 0                         | 1                         |
| 33     | 59± 12            | 27 ± 15                                | 58 ± 13                                | 39.4 ± 4.7                             | 49.0±9.1                                                      | 40 ± 22                                   | 18 ± 14                                   | 41 ± 12              | 1                         | 2                         |
| 7      | 76.1 ± 10         | 50.3 ± 8.8                             | 37 ± 18                                | 50.0 ± 0.3                             | 45±13                                                         | 83.1 ± 2.9                                | 56.1 ± 8.8                                | 67.4 ± 8.4           | 2                         | 2                         |
| 21     | 69.4 ± 6.9        | 64.5 ± 3.0                             | 43 ± 14                                | 46 ± 10                                | 44±12                                                         | 76.8 ± 5.6                                | 47 ± 11                                   | 60.3 ± 9.5           | 2                         | 1                         |
| 6      | 76 ± 14           | 38.6 ± 5.8                             | 43 ± 22                                | 45 ± 11                                | 44±17                                                         | 42.7 ± 4.5                                | 12.2 ± 2.3                                | 28.4 ± 3.1           | 0                         | 2                         |
| 41     | 91.7 ± 4.5        | 67 ± 12                                | 30 ± 38                                | 51 ± 17                                | 40±28                                                         | 73.6 ± 9.6                                | 11 ± 11                                   | 14 ± 12              | 0                         | 1                         |
| 38     | 88.9 ± 4.3        | 26 ± 14                                | 34 ± 34                                | 49 ± 20                                | 36±23                                                         | 92.2 ± 3.3                                | 54 ± 19                                   | 58 ± 19              | 0                         | 2                         |
| 35     | 79.0 ± 9.7        | 47 ± 18                                | 38 ± 27                                | 28 ± 18                                | 33±23                                                         | 87.4 ± 6.2                                | 80.5 ± 9.9                                | 91.9 ± 5.0           | 2                         | 2                         |
| 60     | 90.9 ± 4.0        | 38 ± 11                                | 10.1 ± 6.1                             | 57.2 ± 7.3                             | 32.3±3.3                                                      | 92.1 ± 2.4                                | 92.7 ± 4.7                                | 99.3 ± 1.3           | 2                         | 3                         |
| 52     | 72.7 ± 8.8        | 36 ± 19                                | 14.2 ± 9.2                             | 47 ± 14                                | 30±11                                                         | 78.1 ± 2.3                                | 43 ± 16                                   | 55 ± 19              | 2                         | 2                         |
| 14     | 93.0 ± 3.6        | 65 ± 17                                | 40 ± 19                                | 10.6 ± 5.8                             | 26.1±8.1                                                      | 99.3 ± 0.6                                | 99.3 ± 0.6                                | 99.8 ± 0.4           | 2                         | 2                         |
| 28     | 83 ± 18           | 58.8 ± 12.0                            | 0.8 ± 0.8                              | 62.6 ± 4.3                             | 30.0±2.5                                                      | 46.4 ± 1.4                                | 3.8 ± 2.9                                 | 8.1 ± 6.1            | 0                         | 1                         |
| 46     | 29.7 ± 7.8        | 25.2 ± 4.3                             | 26 ± 11                                | 22.0 ± 6.0                             | 24.4±8.6                                                      | 59.4 ± 6.6                                | 16.6 ± 7.9                                | 27 ± 11              | 0                         | 1                         |
| 42     | 73 ± 13           | 62.5 ± 7.9                             | 24 ± 11                                | 18 ± 12                                | 21±11                                                         | 49.7 ± 3.2                                | 5.1 ± 4.8                                 | 9.8 ± 8.8            | 0                         | 0                         |
| 4      | 85.2 ± 5.3        | 33.9 ± 4.8                             | 26.1 ± 7.8                             | 9.7 ± 8.6                              | 18.4±5.6                                                      | 78.4 ± 2.8                                | 61.1 ± 5.4                                | 77.8 ± 4.2           | 2                         | 2                         |
| 24     | 86.5 ± 5.1        | 62 ± 10                                | 11 ± 11                                | 27.7 ± 9.3                             | 19.0±8.4                                                      | 84.4 ± 6.0                                | 29 ± 12                                   | 34 ± 12              | 0                         | 1                         |
| 43     | 92.7 ± 2.5        | 80 ± 11                                | 14.6 ± 6.2                             | 26 ± 10                                | 17.4±3.5                                                      | 60.1 ± 7.5                                | 9.5 ± 8.7                                 | 15 ± 12              | 0                         | 1                         |
| 17     | 86.3 ± 7.5        | 84.6 ± 5.3                             | 1.8 ± 0.5                              | 13.4 ± 0.8                             | 7.3±0.1                                                       | 92.7 ± 5.4                                | 86 ± 11                                   | 92.3 ± 6.1           | 2                         | 2                         |
| 19     | 90.0 ± 3.5        | 68.0 ± 5.7                             | 3.2 ± 2.5                              | 11.7 ± 4.7                             | 7.2±1.9                                                       | 93.1 ± 0.6                                | 79.3 ± 6.1                                | 85.2 ± 6.4           | 1                         | 2                         |
| 5      | 94.3 ± 2.9        | 66 ± 13                                | 3.3 ± 3.5                              | 16 ± 15                                | 9.2±8.6                                                       | 62 ± 15                                   | 19.9 ± 6.5                                | 32.0 ± 5.6           | 1                         | 2                         |
| 44     | 88.8 ± 4.4        | 52.9 ± 5.9                             | 1.8 ± 1.5                              | 3.1 ± 3.1                              | 2.4±2.2                                                       | 89.3 ± 2.5                                | 66.6 ± 6.1                                | 74.6 ± 6.1           | 1                         | 2                         |
| 39     | 78.7 ± 7.5        | 42 ± 21                                | 5.8 ± 2.6                              | 10.2 ± 6.9                             | 7.9±2.9                                                       | 72 ± 10                                   | 58 ± 14                                   | 80.1 ± 9.5           | 2                         | 2                         |
| 10     | 77.3 ± 10.0       | 36.6 ± 21.7                            | 1.8 ± 2.0                              | 20.8 ± 13.2                            | 10.8±7.2                                                      | 55 ± 20                                   | 16. ± 11                                  | 27 ± 10              | 0                         | 1                         |
| 20     | 87.5 ± 4.2        | 29.5 ± 2.8                             | 0.6 ± 0.9                              | 0.9 ± 1.1                              | 0.7±1.0                                                       | 76.5 ± 3.2                                | 30.9 ± 9.2                                | 40 ± 10              | 0                         | 1                         |
| 23     | 97.0 ± 0.8        | 27.3 ± 6.2                             | 11.0 ± 6.9                             | 0.5 ± 0.0                              | 6.0±3.6                                                       | 68 ± 22                                   | 72 ± 19                                   | 99.7 ± 0.5           | 2                         | 3                         |
| 45     | 38.7 ± 15.6       | 24 ± 15                                | 5.4 ± 5.7                              | 17.3 ± 3.6                             | 9.4±3.0                                                       | 54 ± 16                                   | 28.9 ± 5.9                                | 55.3 ± 7.2           | 0                         | 0                         |
| 31     | 72.5 ± 11.0       | 21.9 ± 4.8                             | 4.6 ± 3.5                              | 17 ± 13                                | 10.4±4.8                                                      | 88.6 ± 0.8                                | 82.6 ± 5.0                                | 93.2 ± 6.5           | 1                         | 1                         |
| 49     | 94.5 ± 2.5        | 21.5 ± 3.7                             | 0.6 ± 0.9                              | 5.1 ± 5.2                              | 2.7±2.9                                                       | 68.3 ± 8.6                                | 20.9 ± 1.4                                | 32.6 ± 7.1           | 1                         | 1                         |
| 18     | 92.2 ± 3.3        | 20.1 ± 5.0                             | 1.0 ± 0.3                              | 0.3 ± 0.1                              | 0.7±0.2                                                       | 19.8 ± 5.4                                | 1.2 ± 0.6                                 | 5.5 ± 1.9            | 0                         | 0                         |
| 12     | 30.9 ± 7.5        | 18.2 ± 0.1                             | 0.7 ± 0.4                              | 3.3 ± 5.7                              | 0.4±0.2                                                       | 57.3 ± 8.0                                | 5.5 ± 2.7                                 | 9.4 ± 3.4            | 0                         | 0                         |
| 27     | 84.9 ± 8.8        | 17.7 ± 5.2                             | 1.8 ± 1.2                              | 23 ± 17                                | 11.5±8.6                                                      | 88.7 ± 2.3                                | 42 ± 11                                   | 47 ± 11              | 0                         | 1                         |
| 56     | 50.5 ± 27.1       | 16.2 ± 7.7                             | 2.0 ± 1.9                              | 7.1 ± 4.0                              | 4.4±2.7                                                       | 88.9 ± 1.5                                | 39 ± 12                                   | 44 ± 14              | 0                         | 1                         |
| 50     | 92.0 ± 4.9        | 1.3 ± 0.8                              | 83.7 ± 3.3                             | 43.4 ± 14.7                            | 64.7±8.0                                                      | 65 ± 15                                   | 29.1 ± 6.8                                | 45.0 ± 7.7           | 0                         | 1                         |
| 58     | 83.2 ± 8.1        | 3.5 ± 5.0                              | 64 ± 19                                | 62 ± 13                                | 63±16                                                         | 99.6 ± 0.1                                | 98.0 ± 0.3                                | 98.5 ± 0.2           | 2                         | 2                         |
| 1      | 26.3 ± 10.2       | 1.7 ± 1.2                              | 36.4 ± 4.7                             | 19 ± 11                                | 28.1±7.8                                                      | 99.5 ± 0.5                                | 94.5 ± 7.5                                | 94.9 ± 7.0           | 2                         | 2                         |
| 54     | 86.4±5.7          | 11.0±2.8                               | 4.6±3.6                                | 33±18                                  | 18±10                                                         | 71.8±5.0                                  | 19±11                                     | 25±14                | 0                         | 1                         |
| 32     | 87.3±5.5          | 1.0±0.1                                | 3.1±3.3                                | 20.9±8.2                               | 11.5±5.6                                                      | 17.1±0.7                                  | 2.0±2.2                                   | 11±12                | 0                         | 0                         |
| 29     | 47±24             | 11.6±4.4                               | 9.3±13.0                               | 10.3±9.1                               | 10±11                                                         | 95.2±6.3                                  | 98.4±0.5                                  | 99.6±0.6             | 2                         | 2                         |

*cont.*

| Case # | CD20 <sup>+</sup> | pLYN <sup>+</sup><br>CD20 <sup>+</sup> | pSYK <sup>+</sup><br>CD20 <sup>+</sup> | pBTK <sup>+</sup><br>CD20 <sup>+</sup> | $D(pSYK^+, pBTK^+)$<br>CD20 <sup>+</sup> | FOXO1 <sub>tot</sub><br>CD20 <sup>+</sup> | FOXO1 <sub>cyt</sub><br>CD20 <sup>+</sup> | $F_{cyt/tot}$ | $F_{Ex1}$<br>(0-2) | $F_{Ex2}$<br>(0-3) |
|--------|-------------------|----------------------------------------|----------------------------------------|----------------------------------------|------------------------------------------|-------------------------------------------|-------------------------------------------|---------------|--------------------|--------------------|
| 26     | 93.4 ± 2.7        | 13.2 ± 7.8                             | 13.0 ± 3.4                             | 10.7 ± 15.0                            | 7.9 ± 3.1                                | 33 ± 19                                   | 12.7 ± 5.9                                | 39.7 ± 7.4    | 0                  | 1                  |
| 57     | 94.1 ± 5.4        | 1.5 ± 1.3                              | 0.9 ± 0.8                              | 7.5 ± 5.4                              | 4.0 ± 3.0                                | 81 ± 13                                   | 17.2 ± 9.6                                | 22.8 ± 11     | 0                  | 1                  |
| 9      | 92.2 ± 3.9        | 1.5 ± 0.9                              | 1.5 ± 1.0                              | 6.5 ± 8.7                              | 3.8 ± 4.6                                | 42 ± 15                                   | 2.2 ± 0.6                                 | 5.4 ± 0.8     | 0                  | 1                  |
| 47     | 95.8 ± 2.7        | 1.2 ± 0.6                              | 2.6 ± 0.7                              | 1.9 ± 0.5                              | 2.2 ± 0.1                                | 82 ± 10                                   | 19 ± 14                                   | 22 ± 16       | 0                  | 1                  |
| 16     | 70 ± 11           | 4.1 ± 2.4                              | 3.0 ± 2.2                              | 0.8 ± 0.7                              | 2.0 ± 1.4                                | 78.8 ± 1.0                                | 20.3 ± 3.2                                | 25.8 ± 4.3    | 0                  | 1                  |
| 40     | 83.9 ± 7.4        | 10.3 ± 4.0                             | 1.6 ± 2.3                              | 2.7 ± 2.3                              | 2.1 ± 2.2                                | 41.9 ± 2.2                                | 4.8 ± 2.6                                 | 11.3 ± 5.6    | 0                  | 1                  |
| 55     | 71.6 ± 7.8        | 13 ± 22                                | 0.8 ± 0.2                              | 3.1 ± 1.3                              | 1.9 ± 0.6                                | 70 ± 11                                   | 16 ± 23                                   | 20 ± 27       | 0                  | 0                  |
| 48     | 73 ± 11           | 6.9 ± 5.5                              | 12.0 ± 7.5                             | 16.5 ± 6.8                             | 1.3 ± 0.8                                | 79.6 ± 3.6                                | 20.4 ± 6.4                                | 25.5 ± 7.4    | 0                  | 1                  |
| 36     | 37 ± 21           | 6.3 ± 4.4                              | 0.5 ± 0.6                              | 2.1 ± 2.2                              | 1.3 ± 1.4                                | 90.6 ± 8.5                                | 55 ± 23                                   | 60 ± 20       | 2                  | 2                  |
| 22     | 82.9 ± 9.0        | 1.4 ± 0.3                              | 0.2 ± 0.1                              | 1.7 ± 1.2                              | 0.9 ± 0.5                                | 82.0 ± 5.0                                | 22.5 ± 6.7                                | 27.2 ± 7.0    | 0                  | 0                  |
| 53     | 77 ± 12           | 5.0 ± 3.8                              | 0.2 ± 0.2                              | 1.7 ± 1.0                              | 0.9 ± 0.5                                | 9.3 ± 7.9                                 | 0.2 ± 0.2                                 | 3.9 ± 3.9     | 0                  | 0                  |
| 2      | 74.4 ± 7.2        | 11 ± 12                                | 1.0 ± 1.4                              | 0.4 ± 0.4                              | 0.7 ± 0.9                                | 56.5 ± 4.5                                | 10 ± 12                                   | 17 ± 19       | 0                  | 1                  |

**Table S5: FOXO1 and pAKT<sub>sub</sub> levels in DLBCL cell lines**

| Cell line  |                | FOXO1 <sub>tot</sub> <sup>+</sup> | FOXO1 <sub>cyt</sub> <sup>+</sup> | <i>F</i>    | pAKT <sub>sub</sub> <sup>+</sup> | $\Delta F$ | $\Delta$ pAKT <sub>sub</sub> <sup>+</sup> |
|------------|----------------|-----------------------------------|-----------------------------------|-------------|----------------------------------|------------|-------------------------------------------|
| LY7        | Untreated      | 88.2 ± 1.8                        | 75.9 ± 5.7                        | 86.1 ± 7.9  | 47.1 ± 4.0                       |            |                                           |
|            | Crosslinked    | 87.0 ± 9.5                        | 82.1 ± 13                         | 94.0 ± 4.8  | 62.0 ± 7.4                       | 7.9 ± 3.6  | 14.9 ± 7.9                                |
|            | <i>t</i> -test |                                   |                                   | 0.22        | 0.05                             |            |                                           |
| U2932      | Untreated      | 67.9 ± 4.3                        | 17.6 ± 2.0                        | 30.0 ± 3.3  | 10.7 ± 3.7                       |            |                                           |
|            | Crosslinked    | 80.3 ± 9.1                        | 55.8 ± 19                         | 69 ± 17     | 57.0 ± 2.3                       | 42.5 ± 18  | 46.3 ± 1.4                                |
|            | <i>t</i> -test |                                   |                                   | 0.04        | 0.0002                           |            |                                           |
| DHL4       | Untreated      | 91.1 ± 5.5                        | 84.0 ± 8.5                        | 92.2 ± 6.8  | 51.6 ± 4.1                       |            |                                           |
|            | Crosslinked    | 92.1 ± 2.1                        | 87.9 ± 1.3                        | 95.5 ± 2.1  | 66.0 ± 6.8                       | 3.3 ± 4.7  | 14.4 ± 8.5                                |
|            | <i>t</i> -test |                                   |                                   | 0.49        | 0.05                             |            |                                           |
| DHL6       | Untreated      | 83.1 ± 18                         | 77.6 ± 19                         | 93.4 ± 9.3  | 46.1 ± 2.9                       |            |                                           |
|            | Crosslinked    | 82.8 ± 16                         | 85.4 ± 15                         | 103.6 ± 7.1 | 71.5 ± 7.6                       | 10.2 ± 2.6 | 25.5 ± 8.5                                |
|            | <i>t</i> -test |                                   |                                   | 0.21        | 0.02                             |            |                                           |
| HBL-1      | Untreated      | 68.7 ± 20                         | 17.2 ± 8.6                        | 24.0 ± 6.2  | 14.3 ± 1.3                       |            |                                           |
|            | Crosslinked    | 88.8 ± 9.0                        | 74.9 ± 18                         | 83.6 ± 11   | 73.0 ± 12                        | 59.5 ± 7.5 | 58.7 ± 11                                 |
|            | <i>t</i> -test |                                   |                                   | 0.003       | 0.01                             |            |                                           |
| LY3        | Untreated      | 85.1 ± 12                         | 55.8 ± 2.1                        | 66.7 ± 12   | 28.7 ± 4.7                       |            |                                           |
|            | Crosslinked    | 71.1 ± 30                         | 53.7 ± 18                         | 77.6 ± 8.4  | 42.2 ± 5.8                       | 10.9 ± 5.7 | 13.6 ± 11                                 |
|            | <i>t</i> -test |                                   |                                   | 0.28        | 0.04                             |            |                                           |
| Pfeiffer   | Untreated      | 67.6 ± 33                         | 58.2 ± 35                         | 80.5 ± 21   | 26.9 ± 1.7                       |            |                                           |
|            | Crosslinked    | 57.3 ± 35                         | 53.7 ± 19                         | 98.7 ± 17   | 37.7 ± 4.5                       | 18.2 ± 8.5 | 10.8 ± 3.3                                |
|            | <i>t</i> -test |                                   |                                   | 0.32        | 0.04                             |            |                                           |
| Toledo     | Untreated      | 89.4 ± 3.3                        | 81.7 ± 7.7                        | 91.3 ± 6.6  | 53.8 ± 2.8                       |            |                                           |
|            | Crosslinked    | 88.2 ± 8.3                        | 75.7 ± 18                         | 85.1 ± 12   | 51.8 ± 8.3                       | -6.2 ± 7.5 | -3.6 ± 5.6                                |
|            | <i>t</i> -test |                                   |                                   | 0.48        | 0.54                             |            |                                           |
| Karpas 422 | Untreated      | 79.1 ± 21                         | 66.3 ± 21                         | 83.0 ± 5.4  | 29.8 ± 1.2                       |            |                                           |
|            | Crosslinked    | 79.6 ± 15                         | 68.5 ± 18                         | 86.2 ± 14   | 35.4 ± 11                        | 3.2 ± 15   | 5.6 ± 12                                  |
|            | <i>t</i> -test |                                   |                                   | 0.74        | 0.48                             |            |                                           |
| LY4        | Untreated      | 88.7 ± 3.4                        | 88.5 ± 5.0                        | 99.7 ± 2.0  | 60.1 ± 6.8                       |            |                                           |
|            | Crosslinked    | 86.0 ± 3.6                        | 86.0 ± 2.5                        | 100.1 ± 3.7 | 71.2 ± 6.4                       | 0.4 ± 1.9  | 11.1 ± 4.9                                |
|            | <i>t</i> -test |                                   |                                   | 0.87        | 0.11                             |            |                                           |
