# Supplementary material
Source: PubMed Central journal article supplement (PMC5151177)

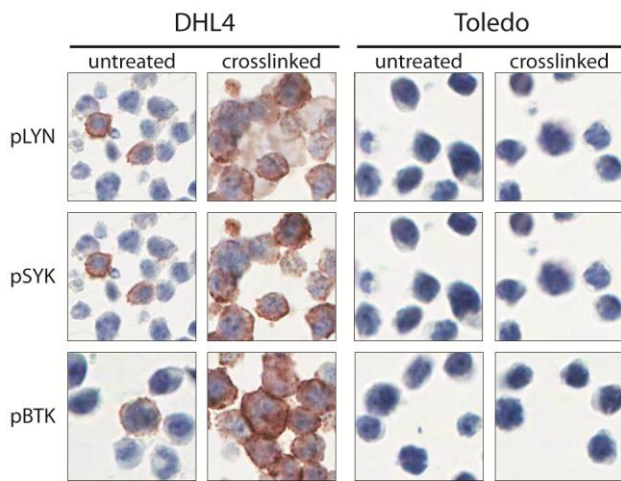

Figure S1

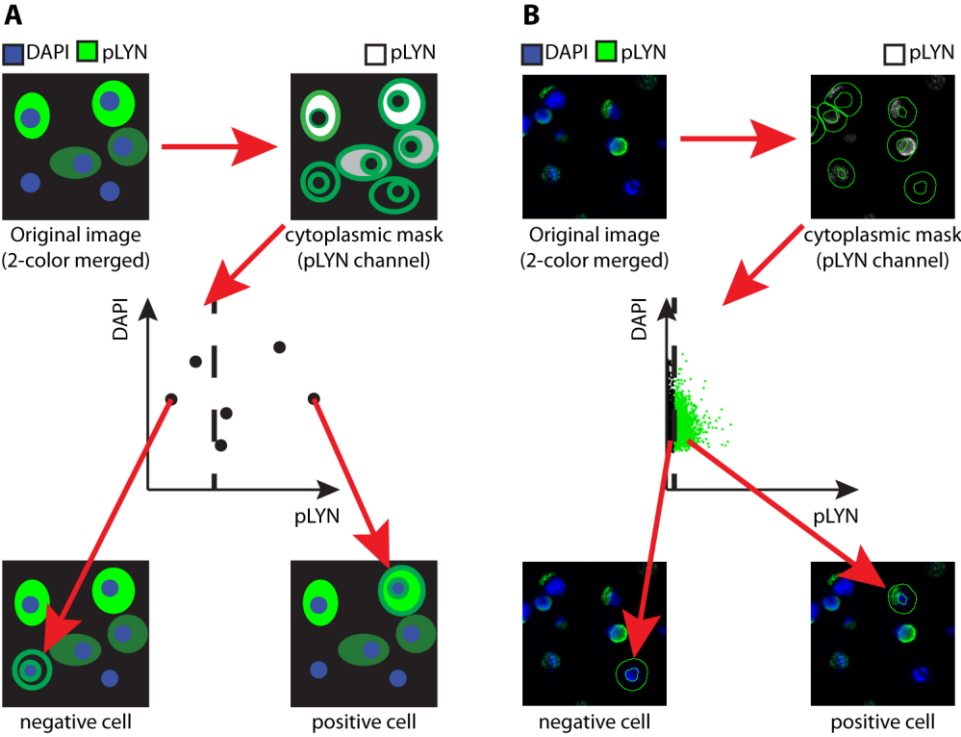

Figure S2

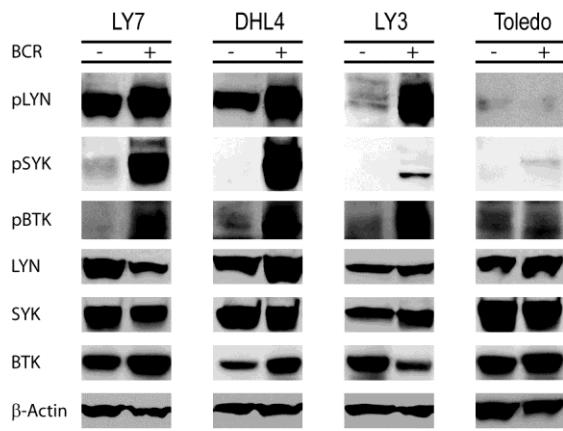

Figure S3

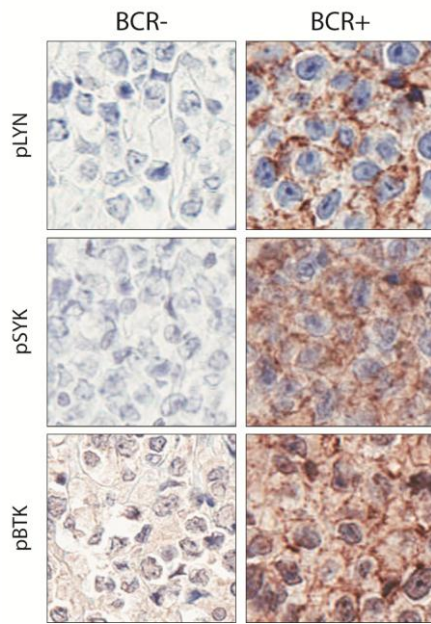

Figure S4

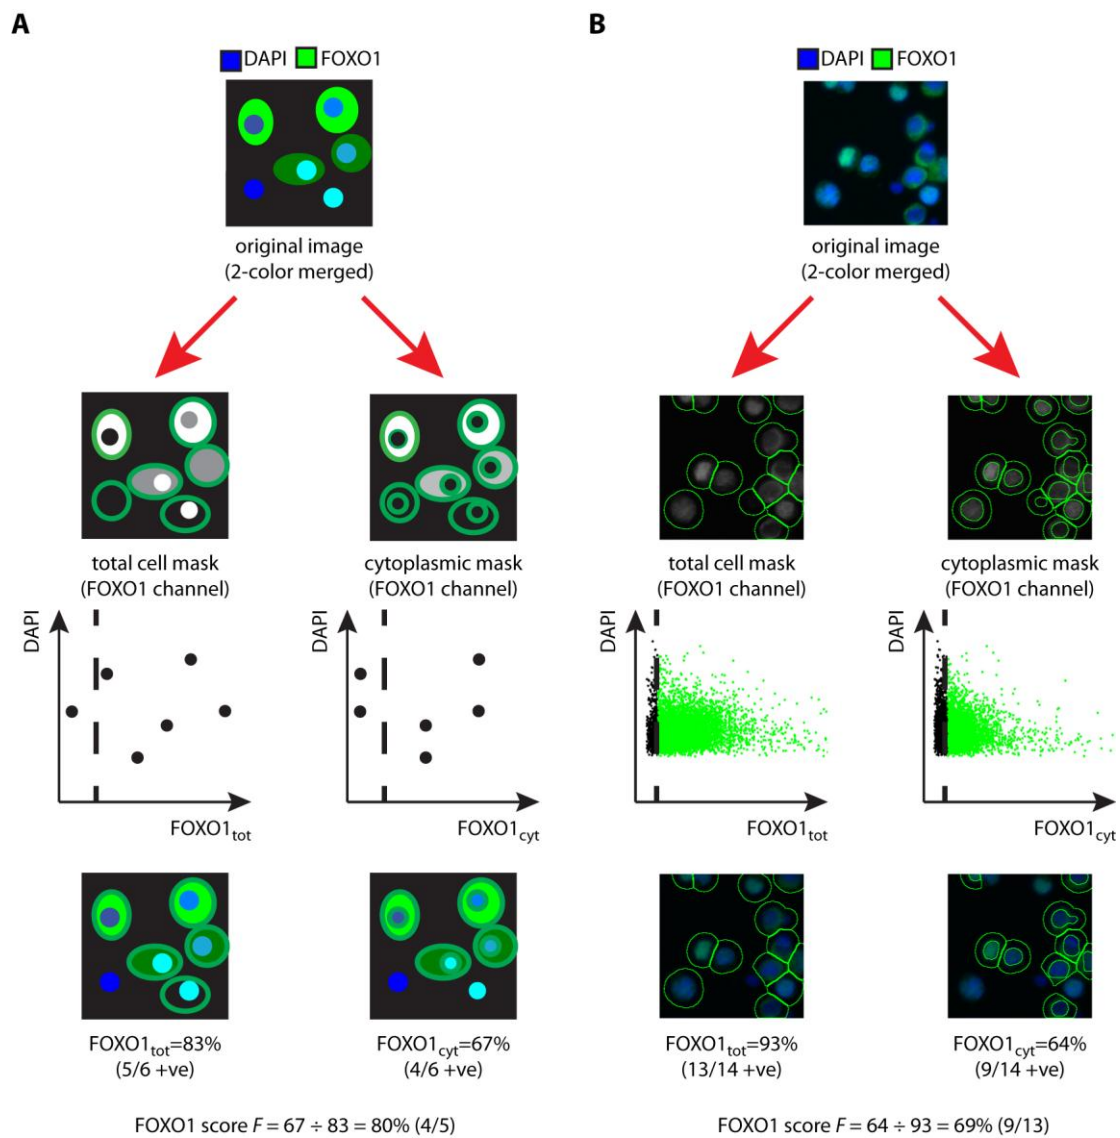

Figure S5

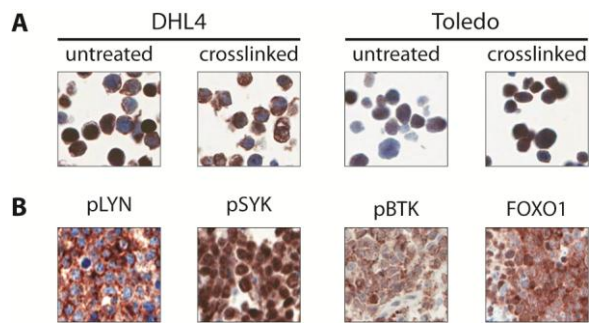

Figure S6

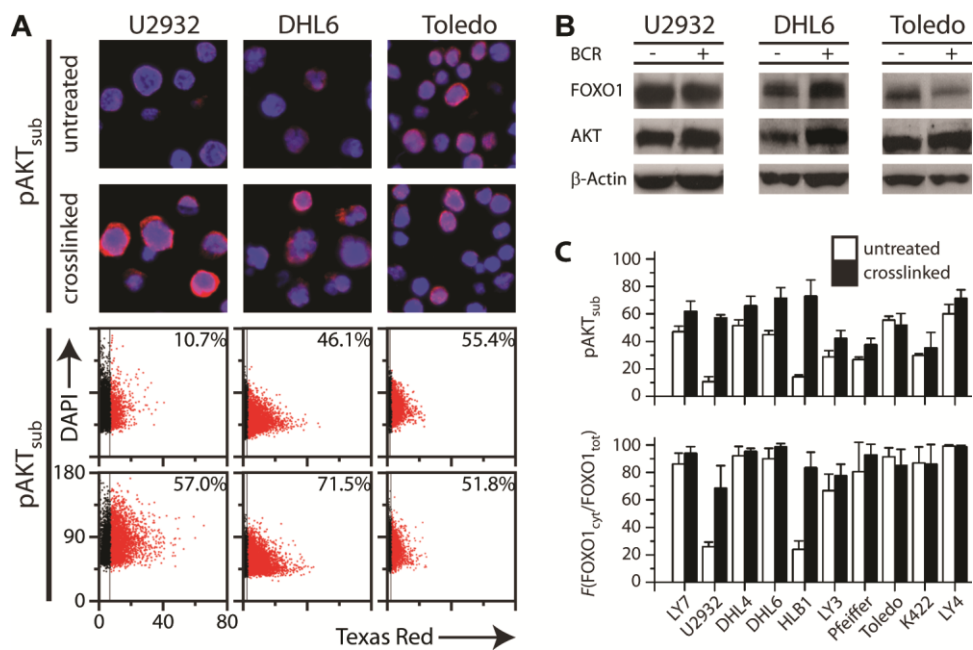

Figure S7

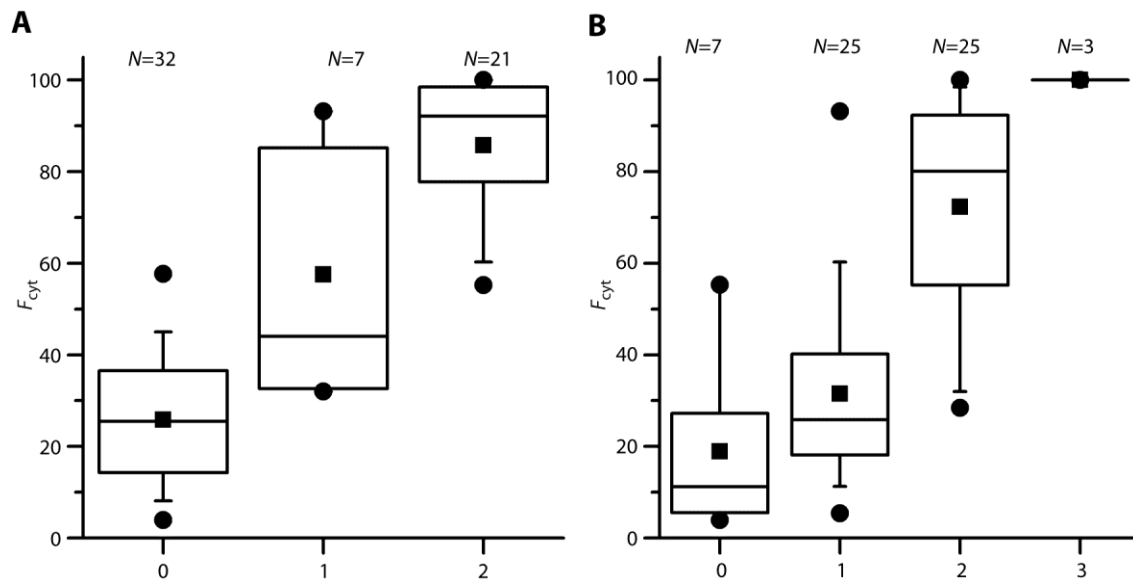

Figure S8



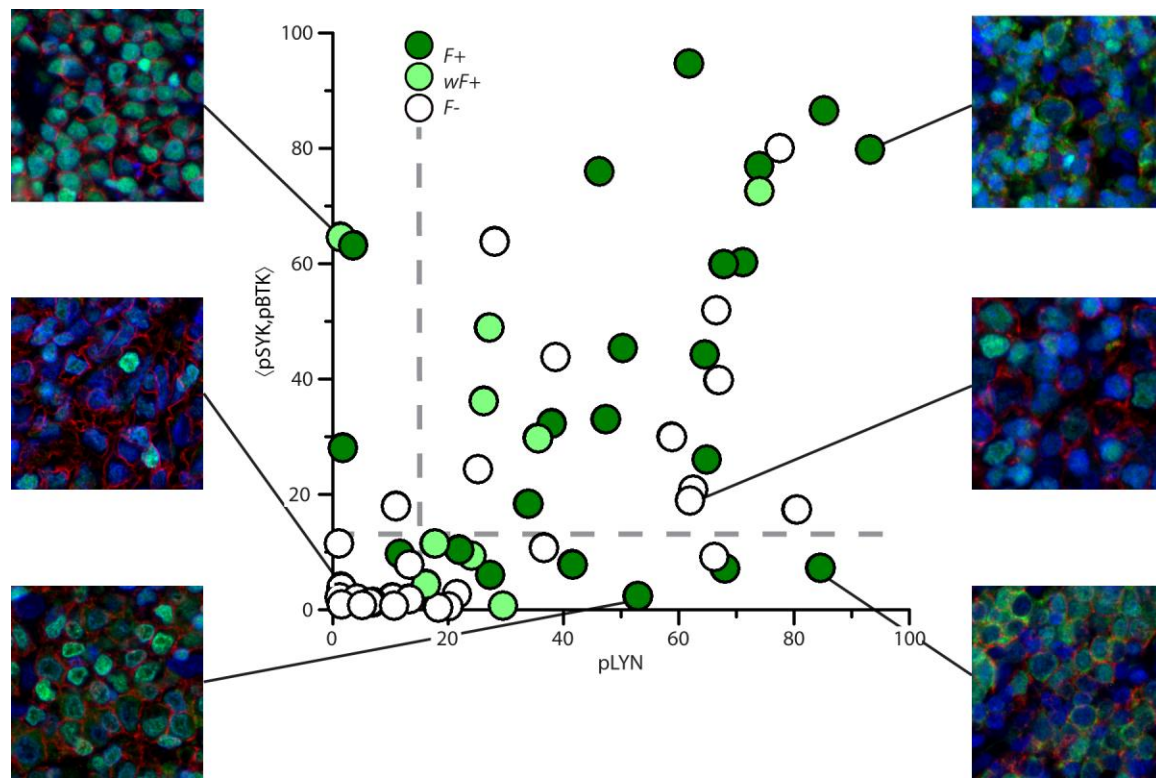

Figure S9

Supplement: NIHMS407331-supplement-4.pdf [file NIHMS407331-supplement-4.pdf]
